# Supplementary material for: Host landing and diel activity of potent vectors of bluetongue disease, Culicoides oxystoma and Culicoides peregrinus
Source: Research Square preprint supplement (doi:10.21203/rs.3.rs-1038977/v2), 2022-03-28
Supplement: Supplementary file 1 [file 317e9532de3ccce01046523e.docx]

| **Supplementary Table 3.** Results of ANOVA using the time, host landing of *Culicoides* as the source of variations for the **observed abundance** in the cattle sheds in the study area (Dharan). The values in bold indicate significance at P < 0.0001 level. T- time, H – Host body parts. |
| --- |
| 1. *Culicoides oxystoma*  | **Source** | | | | **SS** | | | | | **MS** | | | **DF** | **F** | | | | --- | --- | --- | --- | --- | --- | --- | --- | --- | --- | --- | --- | --- | --- | --- | --- | | TIME | | | | 12813.434 | | | | | 1281.343 | | | 10 | **17.546** | | | | HOST LANDING | | | | 10408.242 | | | | | 1734.707 | | | 6 | **23.754** | | | | TIME*HOST LANDING | | | | 49505.948 | | | | | 825.099 | | | 60 | **11.298** | | | | Error | | | | 78725.333 | | | | | 73.029 | | | 1078 |  | | | | Total | | | | 151452.958 | | | | |  | | | 1154 |  | | | | **Contrast** | | **Difference** | | | **Contrast** | | **Difference** | | | **Contrast** | | | | **Difference** | | | T10 vs T7 | | **11.629** | | | T11 vs T1 | | 2.771 | | | T2 vs T6 | | | | 0.219 | | | T10 vs T5 | | **11.610** | | | T1 vs T7 | | 1.000 | | | T2 vs T3 | | | | 0.181 | | | T10 vs T6 | | **11.562** | | | T1 vs T5 | | 0.981 | | | T2 vs T4 | | | | 0.171 | | | T10 vs T3 | | **11.524** | | | T1 vs T6 | | 0.933 | | | T2 vs T8 | | | | 0.038 | | | T10 vs T4 | | **11.514** | | | T1 vs T3 | | 0.895 | | | T8 vs T7 | | | | 0.248 | | | T10 vs T8 | | **11.381** | | | T1 vs T4 | | 0.886 | | | T8 vs T5 | | | | 0.229 | | | T10 vs T2 | | **11.343** | | | T1 vs T8 | | 0.752 | | | T8 vs T6 | | | | 0.181 | | | T10 vs T9 | | **11.019** | | | T1 vs T2 | | 0.714 | | | T8 vs T3 | | | | 0.143 | | | T10 vs T1 | | **10.629** | | | T1 vs T9 | | 0.390 | | | T8 vs T4 | | | | 0.133 | | | T10 vs T11 | | **7.857** | | | T9 vs T7 | | 0.610 | | | T4 vs T7 | | | | 0.114 | | | T11 vs T7 | | 3.771 | | | T9 vs T5 | | 0.590 | | | T4 vs T5 | | | | 0.095 | | | T11 vs T5 | | 3.752 | | | T9 vs T6 | | 0.543 | | | T4 vs T6 | | | | 0.048 | | | T11 vs T6 | | 3.705 | | | T9 vs T3 | | 0.505 | | | T4 vs T3 | | | | 0.010 | | | T11 vs T3 | | 3.667 | | | T9 vs T4 | | 0.495 | | | T3 vs T7 | | | | 0.105 | | | T11 vs T4 | | 3.657 | | | T9 vs T8 | | 0.362 | | | T3 vs T5 | | | | 0.086 | | | T11 vs T8 | | 3.524 | | | T9 vs T2 | | 0.324 | | | T3 vs T6 | | | | 0.038 | | | T11 vs T2 | | 3.486 | | | T2 vs T7 | | 0.286 | | | T6 vs T7 | | | | 0.067 | | | T11 vs T9 | | 3.162 | | | T2 vs T5 | | 0.267 | | | T6 vs T5 | | | | 0.048 | | | **Contrast** | | **Difference** | | | **Contrast** | | **Difference** | | | **Contrast** | | | | **Difference** | | | H3 vs H7 | | **8.903** | | | H1 vs H5 | | 1.485 | | | H2 vs H6 | | | | 0.006 | | | H3 vs H5 | | **8.818** | | | H1 vs H4 | | 1.418 | | | H6 vs H7 | | | | 0.412 | | | H3 vs H4 | | **8.752** | | | H1 vs H6 | | 1.158 | | | H6 vs H5 | | | | 0.327 | | | H3 vs H6 | | **8.491** | | | H1 vs H2 | | 1.152 | | | H6 vs H4 | | | | 0.261 | | | H3 vs H2 | | **8.485** | | | H2 vs H7 | | 0.418 | | | H4 vs H7 | | | | 0.152 | | | H3 vs H1 | | **7.333** | | | H2 vs H5 | | 0.333 | | | H4 vs H5 | | | | 0.067 | | | H1 vs H7 | | 1.570 | | | H2 vs H4 | | 0.267 | | | H5 vs H7 | | | | 0.085 | | |

| 1. *Culicoides peregrinus*  | **Source** | | **SS** | | | **MS** | **DF** | | **F** | | | | --- | --- | --- | --- | --- | --- | --- | --- | --- | --- | --- | | TIME | | 12478.244 | | | 1247.824 | 10 | | **15.632** | | | | HOST LANDING | | 12967.780 | | | 2161.297 | 6 | | **27.076** | | | | TIME*HOST LANDING | | 58232.010 | | | 970.534 | 60 | | **12.159** | | | | Error | | 86048.667 | | | 79.823 | 1078 | |  | | | | Total | | 169726.701 | | |  | 1154 | |  | | | | **Contrast** | | **Difference** | | **Contrast** | **Difference** | | | **Contrast** | | **Difference** | | T10 vs T7 | | **11.105** | | T11 vs T9 | **4.210** | | | T1 vs T6 | | 0.552 | | T10 vs T5 | | **11.086** | | T9 vs T7 | 0.952 | | | T1 vs T4 | | 0.505 | | T10 vs T6 | | **11.067** | | T9 vs T5 | 0.933 | | | T1 vs T3 | | 0.486 | | T10 vs T4 | | **11.019** | | T9 vs T6 | 0.914 | | | T1 vs T2 | | 0.314 | | T10 vs T3 | | **11.000** | | T9 vs T4 | 0.867 | | | T2 vs T7 | | 0.276 | | T10 vs T2 | | **10.829** | | T9 vs T3 | 0.848 | | | T2 vs T5 | | 0.257 | | T10 vs T1 | | **10.514** | | T9 vs T2 | 0.676 | | | T2 vs T6 | | 0.238 | | T10 vs T8 | | **10.390** | | T9 vs T1 | 0.362 | | | T2 vs T4 | | 0.190 | | T10 vs T9 | | **10.152** | | T9 vs T8 | 0.238 | | | T2 vs T3 | | 0.171 | | T10 vs T11 | | **5.943** | | T8 vs T7 | 0.714 | | | T3 vs T7 | | 0.105 | | T11 vs T7 | | **5.162** | | T8 vs T5 | 0.695 | | | T3 vs T5 | | 0.086 | | T11 vs T5 | | **5.143** | | T8 vs T6 | 0.676 | | | T3 vs T6 | | 0.067 | | T11 vs T6 | | **5.124** | | T8 vs T4 | 0.629 | | | T3 vs T4 | | 0.019 | | T11 vs T4 | | **5.076** | | T8 vs T3 | 0.610 | | | T4 vs T7 | | 0.086 | | T11 vs T3 | | **5.057** | | T8 vs T2 | 0.438 | | | T4 vs T5 | | 0.067 | | T11 vs T2 | | **4.886** | | T8 vs T1 | 0.124 | | | T4 vs T6 | | 0.048 | | T11 vs T1 | | **4.571** | | T1 vs T7 | 0.590 | | | T6 vs T7 | | 0.038 | | T11 vs T8 | | **4.448** | | T1 vs T5 | 0.571 | | | T6 vs T5 | | 0.019 | | **Contrast** | | **Difference** | | **Contrast** | **Difference** | | | **Contrast** | | **Difference** | | H3 vs H7 | | **9.915** | | H1 vs H5 | 1.224 | | | H2 vs H6 | | 0.067 | | H3 vs H5 | | **9.806** | | H1 vs H4 | 1.067 | | | H6 vs H7 | | 0.339 | | H3 vs H4 | | **9.648** | | H1 vs H6 | 0.994 | | | H6 vs H5 | | 0.230 | | H3 vs H6 | | **9.576** | | H1 vs H2 | 0.927 | | | H6 vs H4 | | 0.073 | | H3 vs H2 | | **9.509** | | H2 vs H7 | 0.406 | | | H4 vs H7 | | 0.267 | | H3 vs H1 | | **8.582** | | H2 vs H5 | 0.297 | | | H4 vs H5 | | 0.158 | | H1 vs H7 | | 1.333 | | H2 vs H4 | 0.139 | | | H5 vs H7 | | 0.109 | |
| --- | --- | --- | --- | --- | --- | --- | --- | --- | --- | --- | --- | --- | --- | --- | --- | --- | --- | --- | --- | --- | --- | --- | --- | --- | --- | --- | --- | --- | --- | --- | --- | --- | --- | --- | --- | --- | --- | --- | --- | --- | --- | --- | --- | --- | --- | --- | --- | --- | --- | --- | --- | --- | --- | --- | --- | --- | --- | --- | --- | --- | --- | --- | --- | --- | --- | --- | --- | --- | --- | --- | --- | --- | --- | --- | --- | --- | --- | --- | --- | --- | --- | --- | --- | --- | --- | --- | --- | --- | --- | --- | --- | --- | --- | --- | --- | --- | --- | --- | --- | --- | --- | --- | --- | --- | --- | --- | --- | --- | --- | --- | --- | --- | --- | --- | --- | --- | --- | --- | --- | --- | --- | --- | --- | --- | --- | --- | --- | --- | --- | --- | --- | --- | --- | --- | --- | --- | --- | --- | --- | --- | --- | --- | --- | --- | --- | --- | --- | --- | --- | --- | --- | --- | --- | --- | --- | --- | --- | --- | --- | --- | --- | --- | --- | --- | --- | --- | --- | --- | --- | --- | --- | --- | --- | --- | --- | --- | --- | --- | --- | --- | --- | --- | --- | --- | --- | --- | --- | --- | --- | --- | --- | --- | --- | --- | --- | --- | --- | --- | --- | --- | --- | --- | --- | --- | --- | --- | --- | --- | --- | --- | --- | --- | --- | --- | --- | --- | --- | --- | --- | --- | --- | --- | --- | --- | --- | --- | --- | --- | --- | --- | --- | --- | --- | --- | --- | --- | --- | --- | --- | --- | --- | --- | --- | --- | --- | --- | --- | --- | --- | --- | --- | --- | --- | --- | --- | --- | --- | --- | --- | --- | --- | --- | --- | --- | --- | --- | --- | --- | --- | --- | --- | --- | --- | --- | --- | --- | --- | --- | --- | --- | --- | --- | --- | --- | --- | --- | --- | --- | --- | --- | --- | --- | --- | --- | --- | --- | --- | --- | --- | --- | --- | --- | --- | --- | --- | --- | --- | --- | --- | --- | --- | --- | --- | --- | --- | --- | --- | --- | --- | --- | --- | --- | --- | --- | --- | --- | --- | --- | --- | --- | --- | --- | --- | --- | --- | --- | --- | --- | --- | --- | --- | --- | --- | --- | --- | --- | --- | --- | --- | --- | --- | --- | --- | --- | --- | --- | --- | --- | --- | --- | --- | --- | --- |
