# Supplementary material for: Host landing and diel activity of potent vectors of bluetongue disease, Culicoides oxystoma and Culicoides peregrinus
Source: Research Square preprint supplement (doi:10.21203/rs.3.rs-1038977/v2), 2022-03-28
Supplement: Supplementary file 2 [file e4a79165a91fa2480b610fb2.docx]

| **Supplementary Table 1.**  *C. oxystoma* and *C. peregrinus* collected from body parts of cow at various time (hr) in Dharan, West Bengal. H1, head; H2, neck; H3, hump; H4, back; H5, leg; H6, belly; H7, hip of the cattle. | | | | | | | | | | | | | |
| --- | --- | --- | --- | --- | --- | --- | --- | --- | --- | --- | --- | --- | --- |
|  |  |  | **18.00-19.00** | **19.00-20.00** | **20.00-21.00** | **21.00-22.00** | **23.00-00.00** | **00.00-01.00** | **1.00-2.00** | **2.00-3.00** | **3.00-4.00** | **4.00-5.00** | **5.00-6.00** |
| *C. oxystoma* | Non engorged | H1 | 0.0-7.0  1.9±0.52 | 0.0-2.0  0.5±0.19 | 0.0-2.0  0.2±0.15 | 0.0-1.0  0.1±0.07 | 0.0-1.0  0.1±0.07 | 0.0-2.0  0.2±0.15 | 0.0-0.0  0.0±0.00 | 0.0-1.0  0.2±0.11 | 0.0-4.0  0.9±0.36 | 0.0-31.0  7.2±2.25 | 0.0-8.0  2.9±0.74 |
| H2 | 0.0-1.0  0.1±0.09 | 0.0-3.0  0.2±0.2 | 0.0-0.0  0.0±0.0 | 0.0-2.0  0.3±0.16 | 0.0-1.0  0.1±0.09 | 0.0-1.0  0.1±0.07 | 0.0-0.0  0.0±0.00 | 0.0-1.0  0.1±0.07 | 0.0-1.0  0.2±0.11 | 0.0-6.0  1.3±0.55 | 0.0-11.0  1.3±0.72 |
| H3 | 0.0-10.0  2.0±0.68 | 0.0-7.0  1.0±0.47 | 0.0-2.0  0.3±0.15 | 0.0-2.0  0.3±0.19 | 0.0-2.0  0.2±0.15 | 0.0-2.0  0.3±0.16 | 0.0-1.0  0.1±0.09 | 0.0-5.0  0.5±0.35 | 0.0-6.0  1.67±0.56 | 0.0-151  44.53±11.38 | 0.0-41.0  12.87±3.64 |
| H4 | 0.0-0.0  0.0±0.0 | 0.0-0.0  0.0±0.0 | 0.0-0.0  0.0±0.0 | 0.0-3.0  0.2±0.2 | 0.0-0.0  0.0±0.00 | 0.0-0.0  0.0±0.00 | 0.0-0.0  0.0±0.00 | 0.0-1.0  0.1±0.07 | 0.0-0.0  0.0±0.00 | 0.0-7.0  0.53±0.47 | 0.0-6.0  0.4±0.4 |
| H5 | 0.0-0.0  0.0±0.0 | 0.0-0.0  0.0±0.0 | 0.0-0.0  0.0±0.0 | 0.0-1.0  0.1±0.07 | 0.0-0.0  0.0±0.00 | 0.0-0.0  0.0±0.00 | 0.0-0.0  0.0±0.00 | 0.0-0.0  0.0±0.00 | 0.0-1.0  0.1±0.09 | 0.0-3.0  0.33±0.21 | 0.0-3.0  0.3±0.20 |
| H6 | 0.0-4.0  0.5±0.29 | 0.0-1.0  0.1±0.07 | 0.0-1.0  0.1±0.09 | 0.0-1.0  0.1±0.07 | 0.0-0.0  0.0±0.00 | 0.0-1.0  0.1±0.07 | 0.0-2.0  0.1±0.13 | 0.0-1.0  0.1±0.07 | 0.0-7.0  0.5±0.47 | 0.0-7.0  1.47±0.49 | 0.0-2.0  0.4±0.19 |
| H7 | 0.0-0.0  0.0±0.0 | 0.0-0.0  0.0±0.0 | 0.0-0.0  0.0±0.0 | 0.0-0.0  0.0±0.0 | 0.0-0.0  0.0±0.00 | 0.0-0.0  0.0±0.00 | 0.0-0.0  0.0±0.00 | 0.0-0.0  0.0±0.00 | 0.0-0.0  0.0±0.00 | 0.0-1.0  0.07±0.06 | 0.0-1.0  0.07±0.06 |
| Engorged | H1 | 0.0-3.0  0.9±0.27 | 0.0-0.0  0.0±0.0 | 0.0-2.0  0.1±0.13 | 0.0-0.0  0.0±0.0 | 0.0-0.0  0.0±0.00 | 0.0-0.0  0.0±0.00 | 0.0-0.0  0.0±0.00 | 0.0-2.0  0.1±0.01 | 0.0-0.0  0.0±0.00 | 0.0-7.0  1.67±0.62 | 0.0-3.0  0.5±0.22 |
| H2 | 0.0-0.0  0.0±0.0 | 0.0-1.0  0.1±0.07 | 0.0-1.0  0.1±0.07 | 0.0-0.0  0.0±0.0 | 0.0-0.0  0.0±0.00 | 0.0-0.0  0.0±0.00 | 0.0-0.0  0.0±0.00 | 0.0-0.0  0.0±0.00 | 0.0-1.0  0.1±0.09 | 0.0-7.0  0.67±0.49 | 0.0-0.0  0.0±0.00 |
| H3 | 0.0-16.0  1.7±1.08 | 0.0-4.0  0.4±0.27 | 0.0-1.0  0.1±0.09 | 0.0-0.0  0.0±0.0 | 0.0-0.0  0.0±0.00 | 0.0-1.0  0.1±0.07 | 0.0-0.0  0.0±0.00 | 0.0-5.0  0.8±0.38 | 0.0-8.0  0.9±0.58 | 0.0-94.0  22.6±7.53 | 0.0-32.0  7.5±2.38 |
| H4 | 0.0-0.0  0.0±0.0 | 0.0-1.0  0.1±0.7 | 0.0-0.0  0.0±0.0 | 0.0-0.0  0.0±0.0 | 0.0-0.0  0.0±0.00 | 0.0-0.0  0.0±0.00 | 0.0-0.0  0.0±0.00 | 0.0-1.0  0.1±0.07 | 0.0-0.0  0.0±0.00 | 0.0-5.0  0.40±0.33 | 0.0-1.0  0.07±0.06 |
| H5 | 0.0-2.0  0.13±0.13 | 0.0-0.0  0.0±0.0 | 0.0-1.0  0.1±0.07 | 0.0-0.0  0.0±0.0 | 0.0-0.0  0.0±0.00 | 0.0-0.0  0.0±0.00 | 0.0-0.0  0.0±0.00 | 0.0-0.0  0.0±0.00 | 0.0-0.0  0.0±0.00 | 0.0-1.0  0.07±0.06 | 0.0-0.0  0.0±0.00 |
| H6 | 0.0-0.0  0.0±0.0 | 0.0-0.0  0.0±0.0 | 0.0-0.0  0.0±0.0 | 0.0-0.0  0.0±0.0 | 0.0-0.0  0.0±0.00 | 0.0-0.0  0.0±0.00 | 0.0-0.0  0.0±0.00 | 0.0-1.0  0.1±0.07 | 0.0-0.0  0.0±0.00 | 0.0-10.0  0.8±0.67 | 0.0-3.0  0.3±0.20 |
| H7 | 0.0-0.0  0.0±0.0 | 0.0-0.0  0.0±0.0 | 0.0-0.0  0.0±0.0 | 0.0-0.0  0.0±0.0 | 0.0-0.0  0.0±0.00 | 0.0-0.0  0.0±0.00 | 0.0-0.0  0.0±0.00 | 0.0-0.0  0.0±0.00 | 0.0-0.0  0.0±0.00 | 0.0-0.0  0.0±0.00 | 0.0-0.0  0.0±0.00 |
| *C. peregrinus* | Non engorged | H1 | 0.0-4.0  1.1±0.36 | 0.0-2.0  0.2±0.14 | 0.0-1.0  0.1±0.07 | 0.0-0.0  0.0±0.00 | 0.0-0.0  0.0±0.00 | 0.0-1.0  0.2±0.11 | 0.0-1.0  0.1±0.07 | 0.0-1.0  0.2±0.11 | 0.0-8.0  0.7±0.54 | 0.0-11.0  3.3±0.98 | 0.0-11.0  2.3+0.76 |
| H2 | 0.0-1.0  0.1±0.09 | 0.0-0.0  0.0±0.0 | 0.0-0.0  0.0±0.00 | 0.0-2.0  0.1±0.13 | 0.0-0.0  0.0±0.00 | 0.0-1.0  0.1±0.07 | 0.0-0.0  0.0±0.00 | 0.0-9.0  0.6±0.60 | 0.0-1.0  0.1±0.09 | 0.0-2.0  0.27±0.18 | 0.0-2.0  0.3+0.19 |
| H3 | 0.0-6.0  1.0±0.47 | 0.0-2.0  0.3±0.16 | 0.0-1.0  0.2±0.11 | 0.0-0.0  0.0±0.00 | 0.0-1.0  0.1±0.09 | 0.0-1.0  0.1±0.07 | 0.0-0.0  0.0±0.00 | 0.0-4.0  0.3±0.27 | 0.0-29.0  2.0±1.9 | 0.0-121.0  43.5±10.75 | 0.0-141.0  16.1+9.32 |
| H4 | 0.0-0.0  0.0±0.0 | 0.0-0.0  0.0±0.00 | 0.0-2.0  0.2±0.15 | 0.0-1.0  0.1±0.07 | 0.0-0.0  0.0±0.00 | 0.0-0.0  0.0±0.00 | 0.0-0.0  0.0±0.00 | 0.0-9.0  0.6±0.60 | 0.0-4.0  0.3±0.26 | 0.0-17.0  1.2±1.13 | 0.0-0.0  0.0+0.00 |
| H5 | 0.0-0.0  0.0±0.0 | 0.0-1.0  0.1±0.07 | 0.0-1.0  0.1±0.1 | 0.0-0.0  0.0±0.00 | 0.0-1.0  0.1±0.07 | 0.0-0.0  0.0±0.00 | 0.0-0.0  0.0±0.00 | 0.0-0.0  0.0±0.00 | 0.0-0.0  0.0±0.00 | 0.0-0.0  0.0±0.00 | 0.0-4.0  0.3+0.27 |
| H6 | 0.0-3.0  0.5±0.27 | 0.0-0.0  0.0±0.00 | 0.0-0.0  0.0±0.00 | 0.0-4.0  0.3±0.3 | 0.0-0.0  0.0±0.00 | 0.0-1.0  0.1±0.07 | 0.0-0.0  0.0±0.00 | 0.0-8.0  0.5±0.53 | 0.0-1.0  0.1±0.07 | 0.0-4.0  0.7±0.30 | 0.0-1.0  0.2+0.11 |
| H7 | 0.0-0.0  0.0±0.0 | 0.0-0.0  0.0±0.00 | 0.0-0.0  0.0±0.00 | 0.0-0.0  0.0±0.0 | 0.0-0.0  0.0±0.00 | 0.0-0.0  0.0±0.00 | 0.0-0.0  0.0±0.00 | 0.0-0.0  0.0±0.00 | 0.0-0.0  0.0±0.00 | 0.0-1.0  0.07±0.06 | 0.0-0.0  0.0+0.00 |
| Engorged | H1 | 0.0-3.0  0.4±0.21 | 0.0-3.0  0.3±0.21 | 0.0-1.0  0.1±0.09 | 0.0-1.0  0.1±0.09 | 0.0-1.0  0.1±0.07 | 0.0-1.0  0.1±0.09 | 0.0-0.0  0.0±0.00 | 0.0-2.0  0.3±0.18 | 0.0-6.0  1.13±0.5 | 0.0-7.0  2.13±0.69 | 0.0-7.0  1.8+0.50 |
| H2 | 0.0-2.0  0.3±0.16 | 0.0-2.0  0.0±0.15 | 0.0-0.0  0.0±0.00 | 0.0-1.0  0.1±0.07 | 0.0-0.0  0.0±0.00 | 0.0-0.0  0.0±0.00 | 0.0-0.0  0.0±0.00 | 0.0-30.0  2.0±2.0 | 0.0-2.0  0.13±0.13 | 0.0-1.0  0.07±0.06 | 0.0-1.0  0.1+0.09 |
| H3 | 0.0-4.0  0.5±0.3 | 0.0-13.0  1.1±0.86 | 0.0-2.0  0.3±0.16 | 0.0-1.0  0.1±0.07 | 0.0-2.0  0.2±0.15 | 0.0-1.0  0.1±0.07 | 0.0-2.0  0.13±0.13 | 0.0-5.0  0.6±0.38 | 0.0-25.0  2.07±1.7 | 0.0-76.0  25.6±6.20 | 0.0-69.0  14.7+5.35 |
| H4 | 0.0-2.0  0.1±0.13 | 0.0-0.0  0.0±0.00 | 0.0-0.0  0.0±0.0 | 0.0-1.0  0.1±0.07 | 0.0-0.0  0.0±0.00 | 0.0-0.0  0.0±0.00 | 0.0-0.0  0.0±0.00 | 0.0-2.0  0.13±0.13 | 0.0-0.0  0.0±0.0 | 0.0-5.0  0.4±0.34 | 0.0-0.0  0.0+0.00 |
| H5 | 0.0-1.0  0.1±0.07 | 0.0-1.0  0.1±0.07 | 0.0-0.0  0.0±0.0 | 0.0-0.0  0.0±0.0 | 0.0-0.0  0.0±0.00 | 0.0-0.0  0.0±0.00 | 0.0-0.0  0.0±0.00 | 0.0-0.0  0.0±0.00 | 0.0-0.0  0.0±0.0 | 0.0-1.0  0.2±0.11 | 0.0-4.0  0.5+0.29 |
| H6 | 0.0-1.0  0.1±±0.09 | 0.0-0.0  0.0±0.0 | 0.0-0.0  0.0±0.0 | 0.0-1.0  0.1±0.09 | 0.0-0.0  0.0±0.00 | 0.0-0.0  0.0±0.00 | 0.0-1.0  0.1±0.07 | 0.0-1.0  0.1±0.07 | 0.0-4.0  0.47±0.29 | 0.0-6.0  0.5±0.40 | 0.0-1.0  0.07+0.06 |
| H7 | 0.0-0.0  0.0±0.0 | 0.0-0.0  0.0±0.0 | 0.0-0.0  0.0±0.0 | 0.0-0.0  0.0±0.00 | 0.0-0.0  0.0±0.00 | 0.0-0.0  0.0±0.00 | 0.0-1.0  0.1±0.07 | 0.0-0.0  0.0±0.00 | 0.0-0.0  0.0±0.00 | 0.0-0.0  0.0±0.00 | 0.0-0.0  0.0+0.00 |
